# Supplementary material for: Metabolic Alterations in Cancer Cells and the Emerging Role of Oncometabolites as Drivers of Neoplastic Change
Source: Antioxidants (Basel). 2018 Jan 17;7(1):16. doi: 10.3390/antiox7010016 (PMC5789326; doi:10.3390/antiox7010016)
Supplement: Supplementary file 1 [file antioxidants-07-00016-s001.pdf]

| mtDNA Gene                   | Function                                                                                                                                                                                                                                                                  |
|------------------------------|---------------------------------------------------------------------------------------------------------------------------------------------------------------------------------------------------------------------------------------------------------------------------|
| MT-ND1                       | NADH-ubiquinone oxidoreductase chain 1 - this protein is a subunit of NADH dehydrogenase. Specifically, it is a subunit of respiratory chain Complex 1 belonging to a complex of proteins necessary to initiate NADH dehydrogenation and electron transfer to ubiquinone. |
| MT-ND2                       | Same function as MT-ND1                                                                                                                                                                                                                                                   |
| MT-ND3                       | Same function as MT-ND1                                                                                                                                                                                                                                                   |
| MT-ND4L                      | Same function as MT-ND1                                                                                                                                                                                                                                                   |
| MT-ND4                       | Same function as MT-ND1                                                                                                                                                                                                                                                   |
| MT-ND5                       | Same function as MT-ND1                                                                                                                                                                                                                                                   |
| MT-ND6                       | Same function as MT-ND1                                                                                                                                                                                                                                                   |
| MT-CYB                       | Encodes protein Cytochrome b which is a subunit of Ubiquinone Cytochrome c Reductase (Complex III) respiratory chain.                                                                                                                                                     |
| MT-CO1,<br>MT-CO2,<br>MT-CO3 | Encodes proteins subunits Cytochrome c oxidases, which make up the Cytochrome c oxidase of respiratory complex IV.                                                                                                                                                        |
| MT-ATP6<br>MT-ATP8           | Encodes protein ATP Synthase which is part of Respiratory complex V.                                                                                                                                                                                                      |

Supplementary Table 1. Mitochondrial Genes Encoding Respiratory Chain Components. Table lists mitochondrial genes (MD-ND1-6, MT-CYB, MT-COL1-3, MT-ATP6-8) with brief description of their function.
